# Supplementary material for: Combined In Silico and In Vitro Evidence Supporting an Aurora A Kinase Inhibitory Role of the Anti-Viral Drug Rilpivirine and an Anti-Proliferative Influence on Cancer Cells
Source: MDPI journal article supplement (doi:10.3390/ph15101186), 2022-09-25
Supplement: s1 [file s1]

# Supporting Information

## **Combined *in silico* and *in vitro* evidence supporting an Aurora-A kinase inhibitory role of the anti-viral drug rilpivirine and an anti-proliferative influence on cancer cells**

Saiful Islam<sup>1</sup>, Theodosia Teo<sup>1</sup>, Malika Kumarasiri<sup>1</sup>, Martin Slater<sup>3</sup>, Jennifer H. Martin<sup>2</sup>, Shudong Wang<sup>1</sup>, Richard Head<sup>1\*</sup>

<sup>1</sup>Drug Discovery and Development, Clinical and Health Sciences, University of South Australia Adelaide SA 5000, Australia.

<sup>2</sup>Centre for Human Drug Repurposing and Medicines Research, University of Newcastle, NSW 2305, Australia.

<sup>3</sup>Cresset Discovery, New Cambridge House, Litlington, Royston, SG8 0SS, United Kingdom.

\*Correspondence: Emeritus Professor Richard Head, Drug Discovery and Development, Clinical and Health Sciences, University of South Australia, Adelaide SA 5000, Australia.

E-mail: richard.head@unisa.edu.au

**Table S1: List of virtual screening-based drug candidates**

|   | Structure                                                                           | Name                | Known pharmacological targets                                                          | Indication                                                                                                                                                                                                                               | BLAZE_Score |
|---|-------------------------------------------------------------------------------------|---------------------|----------------------------------------------------------------------------------------|------------------------------------------------------------------------------------------------------------------------------------------------------------------------------------------------------------------------------------------|-------------|
| 1 | 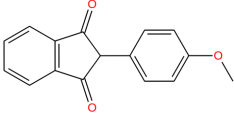   | Anisindione         | Vitamin K-dependent gamma-carboxylase                                                  | Prophylaxis and treatment of venous thrombosis and its extension, the treatment of atrial fibrillation with embolization, the prophylaxis and treatment of pulmonary embolism, and as an adjunct in the treatment of coronary occlusion. | 0.5696      |
| 2 |   | Apomorphine         | Dopamine receptors D(2), D(3), D(4)                                                    | Acute, intermittent treatment of hypomobility, off episodes (end-of-dose wearing off and unpredictable on/off episodes) associated with advanced Parkinson's disease.                                                                    | 0.4362      |
| 3 |  | Atovaquone          | Bacterial Cytochrome b, Bacterial Dihydroorotate dehydrogenase                         | <i>Pneumocystis carinii</i> pneumonia in patients who are intolerant to trimethoprim-sulfamethoxazole (TMP-SMX). Also indicated for the acute mild to moderate PCP in patients who are intolerant to TMP-SMX.                            | 0.442       |
| 4 |  | Bendroflumethiazide | Solute carrier family 12 member 3, Calcium-activated potassium channel subunit alpha-1 | High blood pressure and management of edema related to heart failure.                                                                                                                                                                    | 0.4873      |
| 5 |  | Blonanserin         | D2 receptor; 5-HT2 receptor                                                            | Schizophrenia                                                                                                                                                                                                                            | 0.4399      |

|    | Structure                                                                           | Name         | Known pharmacological targets                                                           | Indication                                                                                                                                             | BLAZE_Score |
|----|-------------------------------------------------------------------------------------|--------------|-----------------------------------------------------------------------------------------|--------------------------------------------------------------------------------------------------------------------------------------------------------|-------------|
| 6  | 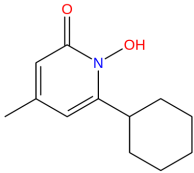   | Ciclopirox   | Sodium/potassium-transporting ATPase subunit alpha-1                                    | Immunocompetent patients with mild to moderate onychomycosis of fingernails and toenails without lunula involvement, due to <i>Trichophyton rubrum</i> | 0.4337      |
| 7  |    | Deferasirox  | Iron chelator                                                                           | Transfusional hemosiderosis                                                                                                                            | 0.4621      |
| 8  |   | Delavirdine  | Reverse transcriptase/RNase H                                                           | HIV-1 infection in combination with appropriate antiretroviral agents                                                                                  | 0.47        |
| 9  |  | Emedastine   | Histamine H1 receptor                                                                   | Allergic conjunctivitis                                                                                                                                | 0.4223      |
| 10 |  | Esomeprazole | Potassium-transporting ATPase alpha chain 1                                             | Acid-reflux disorders (GERD), peptic ulcer disease, H. pylori eradication, and prevention of gastrointestinal bleeds with NSAID use.                   | 0.5953      |
| 11 |  | Eszopiclone  | Gamma-aminobutyric acid receptor subunit alpha-1, Translocator protein, GABA-A receptor | Insomnia                                                                                                                                               | 0.4526      |

|    | Structure                                                                           | Name            | Known pharmacological targets                                                           | Indication                                                                                                                                                                               | BLAZE_Score |
|----|-------------------------------------------------------------------------------------|-----------------|-----------------------------------------------------------------------------------------|------------------------------------------------------------------------------------------------------------------------------------------------------------------------------------------|-------------|
| 12 | 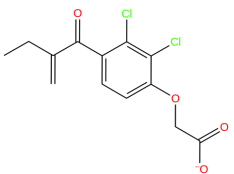   | Ethacrynic acid | Solute carrier family 12 member 1, Sodium/potassium-transporting ATPase subunit alpha-1 | High blood pressure and edema caused by diseases like congestive heart failure, liver failure, and kidney failure.                                                                       | 0.4398      |
| 13 |    | Etravirine      | HIV-1 reverse transcriptase                                                             | HIV-1 infections resistant to therapy with other NNRTIs and antiretroviral agents.                                                                                                       | 0.4982      |
| 14 |    | Fenofibrate     | Peroxisome proliferator-activated receptor alpha                                        | Reduce elevated LDL-C, Total-C, Triglycerides and Apo B, and to increase HDL-C in adult patients with primary hypercholesterolemia or mixed dyslipidemia (Fredrickson Types IIa and IIb) | 0.4275      |
| 15 |  | Flibanserin     | 5-hydroxytryptamine receptor 1A and 2A, D(4) dopamine receptor                          | Hypoactive sexual desire disorder (HSDD) in premenopausal women.                                                                                                                         | 0.4118      |
| 16 |  | Gliclazide      | ATP-binding cassette sub-family C member 8                                              | Reduce hyperglycemia in type 2 diabetes mellitus.                                                                                                                                        | 0.4187      |
| 17 |  | Granisetron     | 5-hydroxytryptamine receptor 3A                                                         | Nausea and vomiting associated with initial and repeat courses of emetogenic cancer therapy (including high dose cisplatin), postoperation, and radiation.                               | 0.4624      |

|    | Structure                                                                           | Name             | Known pharmacological targets                                                                  | Indication                                                                                                                                                                   | BLAZE_Score |
|----|-------------------------------------------------------------------------------------|------------------|------------------------------------------------------------------------------------------------|------------------------------------------------------------------------------------------------------------------------------------------------------------------------------|-------------|
| 18 | 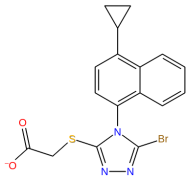   | Lesinurad        | Solute carrier family 22 members 11 and 12                                                     | Hyperuricemia associated with gout in patients who have not achieved target serum uric acid levels with a xanthine oxidase inhibitor alone.                                  | 0.4695      |
| 19 |    | Lucanthone       | DNA topoisomerase 2-alpha, DNA-(apurinic or apyrimidinic site) lyase, DNA, DNA topoisomerase 1 | Radiation sensitizer in the treatment of brain cancer.                                                                                                                       | 0.4272      |
| 20 |   | Minoxidil        | ATP-sensitive inward rectifier potassium channel 1                                             | Severe hypertension and in the topical treatment (regrowth) of androgenic alopecia in males and females and stabilisation of hair loss in patients with androgenic alopecia. | 0.4726      |
| 21 |  | Olanzapine       | 5-hydroxytryptamine receptor 2A, D(2) dopamine receptor                                        | Acute and maintenance treatment of schizophrenia and related psychotic disorders, as well as acute treatment of manic or mixed episodes of bipolar 1 disorder.               | 0.4797      |
| 22 |  | Olodaterol       | Beta-2 adrenergic receptor                                                                     | Chronic obstructive pulmonary disease (COPD), including chronic bronchitis and/or emphysema.                                                                                 | 0.4367      |
| 23 |  | Propylthiouracil | Thyroid peroxidase                                                                             | Hyperthyroidism                                                                                                                                                              | 0.4544      |

|    | Structure                                                                           | Name             | Known pharmacological targets      | Indication                                                                                                                      | BLAZE_Score |
|----|-------------------------------------------------------------------------------------|------------------|------------------------------------|---------------------------------------------------------------------------------------------------------------------------------|-------------|
| 24 | 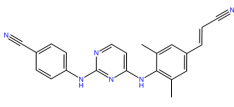   | Rilpivirine      | Reverse transcriptase/RNase H      | HIV-1 infections in combination with at least 2 other antiretroviral agents.                                                    | 0.5593      |
| 25 |    | Ropinirole       | D(2) and D(3) dopamine receptors   | Idiopathic Parkinson's disease. Restless legs syndrome.                                                                         | 0.447       |
| 26 |    | Sulfamethazine   | Dihydropteroate synthase           | Human and animal urinary tract infection                                                                                        | 0.4271      |
| 27 |   | Sulfamoxole      | Dihydropteroate synthetase         | Bacterial infection.                                                                                                            | 0.4649      |
| 28 |  | Tamibarotene     | Retinoic acid receptor alpha       | Relapsed or refractory acute promyelocytic leukemia (APL)                                                                       | 0.4618      |
| 29 |  | Tiaprofenic acid | Prostaglandin G/H synthase 1 and 2 | Pain, arthritic pain.                                                                                                           | 0.4309      |
| 30 |  | Topotecan        | DNA topoisomerase 1, DNA           | Ovarian, cervical cancer                                                                                                        | 0.4627      |
| 31 |  | Tranilast        | Unknown                            | Bronchial asthma, keloid and hypertrophic scar, and allergic disorders such as asthma, allergic rhinitis and atopic dermatitis. | 0.4536      |

|    | Structure                                                                           | Name              | Known pharmacological targets                      | Indication                                                                                                                                                                                                                                                                    | BLAZE_Score |
|----|-------------------------------------------------------------------------------------|-------------------|----------------------------------------------------|-------------------------------------------------------------------------------------------------------------------------------------------------------------------------------------------------------------------------------------------------------------------------------|-------------|
| 32 | 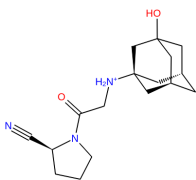   | Vildagliptin      | Dipeptidyl peptidase 4                             | Reduce hyperglycemia in type 2 diabetes mellitus.                                                                                                                                                                                                                             | 0.5172      |
| 33 |    | Abacavir          | Reverse transcriptase/RNase H                      | HIV-1 infection, in combination with other antiretroviral agents.                                                                                                                                                                                                             | 0.4664      |
| 34 |   | Benperidol        | Not available                                      | Psychotic disorders.                                                                                                                                                                                                                                                          | 0.4293      |
| 35 |  | Cloprednol        | Not available                                      | Not available                                                                                                                                                                                                                                                                 | 0.470       |
| 36 |  | Cyclopenthiiazide | Not available                                      | Not available                                                                                                                                                                                                                                                                 | 0.4731      |
| 37 |  | Cyclothiazide     | Sodium/potassium-transporting ATPase subunit gamma | Adjunctive therapy in edema associated with congestive heart failure, hepatic cirrhosis, and corticosteroid and estrogen therapy. It is also indicated in the management of hypertension either as the sole therapeutic agent or to enhance the effectiveness of other drugs. | 0.4814      |

|    | Structure                                                                           | Name           | Known pharmacological targets                                                                                        | Indication                                                                                                                                                                                    | BLAZE_Score |
|----|-------------------------------------------------------------------------------------|----------------|----------------------------------------------------------------------------------------------------------------------|-----------------------------------------------------------------------------------------------------------------------------------------------------------------------------------------------|-------------|
| 38 | 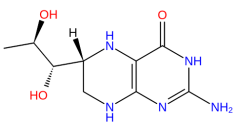   | Dapropterin    | Endothelial nitric oxide synthase, Phenylalanine-4-hydroxylase, Tyrosine 3-monooxygenase, Tryptophan 5-hydroxylase 1 | Tetrahydrobiopterin (BH4) deficiency.                                                                                                                                                         | 0.4799      |
| 39 |    | Daunorubicin   | DNA, DNA topoisomerase 2-alpha                                                                                       | Acute nonlymphocytic leukemia (myelogenous, monocytic, erythroid) of adults and acute lymphocytic leukemia of children and adults.                                                            | 0.4425      |
| 40 |   | Demeclocycline | 30S ribosomal proteins S4 and S9                                                                                     | Lyme disease, acne, and bronchitis. Also indicated (but rarely used) to treat urinary tract infections, gum disease, malaria, and other bacterial infections such as gonorrhea and chlamydia. | 0.4419      |
| 41 |  | Dicumarol      | Vitamin K epoxide reductase complex subunit 1                                                                        | Decreasing blood clotting. Often used along with heparin for treatment of deep vein thrombosis.                                                                                               | 0.4487      |
| 42 |  | Domperidone    | D(2) and D(3) dopamine receptors                                                                                     | Dyspepsia, heartburn, epigastric pain, nausea, and vomiting.                                                                                                                                  | 0.4412      |
| 43 |  | Dorzolamide    | Carbonic anhydrase 2                                                                                                 | Open-angle glaucoma                                                                                                                                                                           | 0.4367      |



|    | Structure                                                                           | Name                | Known pharmacological targets                                                      | Indication                                                               | BLAZE_Score |
|----|-------------------------------------------------------------------------------------|---------------------|------------------------------------------------------------------------------------|--------------------------------------------------------------------------|-------------|
| 44 | 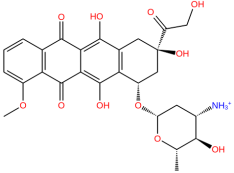   | Doxorubicin         | DNA, DNA topoisomerase 2-alpha                                                     | Disseminated neoplastic conditions                                       | 0.4567      |
| 45 |    | Etifoxine           | Not available                                                                      | Not available                                                            | 0.4465      |
| 46 |   | Exifone             | Not available                                                                      | Not available                                                            | 0.4724      |
| 47 |  | Flubendazole        | disruption of microtubule structure and function                                   | Antiprotozoal                                                            | 0.4918      |
| 48 |  | Hesperetin          | Microsomal triglyceride transfer protein large subunit, Sterol O-acyltransferase 1 | Lowering cholesterol and, possibly, otherwise favorably affecting lipids | 0.4942      |
| 49 |  | Hydrochlorothiazide | Solute carrier family 12 member 3                                                  | High blood pressure and management of edema.                             | 0.4321      |

|    | Structure                                                                           | Name           | Known pharmacological targets       | Indication                                                                                                                                                                                                                                                                                                                                       | BLAZE_Score |
|----|-------------------------------------------------------------------------------------|----------------|-------------------------------------|--------------------------------------------------------------------------------------------------------------------------------------------------------------------------------------------------------------------------------------------------------------------------------------------------------------------------------------------------|-------------|
| 50 | 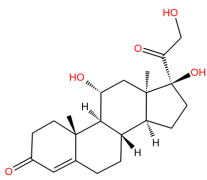   | Hydrocortisone | Glucocorticoid receptor, Annexin A1 | Inflammatory and pruritic manifestations of corticosteroid-responsive dermatoses. Also used to treat endocrine (hormonal) disorders (adrenal insufficiency, Addison's disease). It is also used to treat many immune and allergic disorders, such as arthritis, lupus, severe psoriasis, severe asthma, ulcerative colitis, and Crohn's disease. | 0.4949      |
| 51 |  | Idarubicin     | DNA, DNA topoisomerase 2-alpha      | Acute myeloid leukemia (AML) in adults.                                                                                                                                                                                                                                                                                                          | 0.480       |
| 52 |  | Indisetrone    | 5-HT3 and 5-HT4 receptor            | Prophylaxis of chemotherapy-induced nausea and vomiting                                                                                                                                                                                                                                                                                          | 0.4868      |
| 53 |  | Indoprofen     | Not available                       | Analgesic and anti-inflammatory                                                                                                                                                                                                                                                                                                                  | 0.4844      |
| 54 |  | Iopanoic acid  | Inhibitors of thyroid hormone       | Radiocontrast medium                                                                                                                                                                                                                                                                                                                             | 0.4389      |

|    | Structure                                                                           | Name               | Known pharmacological targets               | Indication                                                                                                                                                                                                                                                                                                         | BLAZE_Score |
|----|-------------------------------------------------------------------------------------|--------------------|---------------------------------------------|--------------------------------------------------------------------------------------------------------------------------------------------------------------------------------------------------------------------------------------------------------------------------------------------------------------------|-------------|
| 55 | 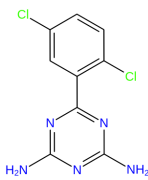   | Irsogladine        | Phosphodiesterase inhibitor                 | Peptic ulcer disease and acute gastritis                                                                                                                                                                                                                                                                           | 0.5156      |
| 56 |    | Lamotrigine        | Sodium channel protein type 2 subunit alpha | Partial seizures in epilepsy and generalized seizures of Lennox-Gastaut syndrome. Also for the maintenance treatment of bipolar I disorder and depression.                                                                                                                                                         | 0.412       |
| 57 |   | Methylprednisolone | Glucocorticoid receptor                     | Adjunctive therapy for short-term administration in rheumatoid arthritis.                                                                                                                                                                                                                                          | 0.4888      |
| 58 |  | Omeprazole         | Potassium-transporting ATPase alpha chain 1 | Duodenal ulcers, benign gastric ulcers, gastroesophageal reflux disease (GERD), heartburn and other symptoms associated with GERD, erosive esophagitis, and long-term treatment of pathological hypersecretory conditions like Zollinger-Ellison syndrome, multiple endocrine adenomas, and systemic mastocytosis. | 0.5433      |
| 59 |  | Oxytetracycline    | 30S ribosomal proteins S4 and s9            | Infections caused by a variety of Gram-positive and Gram-negative microorganisms                                                                                                                                                                                                                                   | 0.4785      |

|    | Structure | Name         | Known pharmacological targets                                             | Indication                                                    | BLAZE_Score |
|----|-----------|--------------|---------------------------------------------------------------------------|---------------------------------------------------------------|-------------|
| 60 |           | Pantoprazole | Potassium-transporting ATPase alpha chain 1                               | Short-term (up to 16 weeks) treatment of erosive esophagitis. | 0.5832      |
| 61 |           | Pimobendan   | Phosphodiesterase 3 (PDE3)                                                | Management of heart failure in dogs                           | 0.4189      |
| 62 |           | Quinethazone | Carbonic anhydrases 1 and 2. Solute carrier family 12 members 1, 2 and 3. | Hypertension.                                                 | 0.5282      |
| 63 |           | Repirinast   | Inhibit histamine release                                                 | Antiallergic                                                  | 0.5012      |
| 64 |           | Revaprazan   | Proton pump inhibitor                                                     | Duodenal ulcer, gastric ulcer and gastritis                   | 0.6037      |
| 65 |           | Stavudine    | Reverse transcriptase/RNase H                                             | Human immunovirus (HIV) infections.                           | 0.4786      |
| 66 |           | Sulfadiazine | Bacterial dihydropteroate synthetase                                      | Rheumatic fever and meningococcal meningitis                  | 0.4786      |

|    | Structure                                                                           | Name               | Known pharmacological targets                                                           | Indication                                                                                                           | BLAZE_Score |
|----|-------------------------------------------------------------------------------------|--------------------|-----------------------------------------------------------------------------------------|----------------------------------------------------------------------------------------------------------------------|-------------|
| 67 | 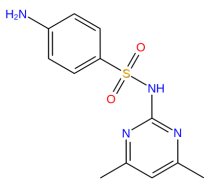   | Sulfamethazine     | Bacterial dihydropteroate synthetase                                                    | Bacterial infections causing bronchitis, prostatitis and urinary tract infections.                                   | 0.4909      |
| 68 |    | Sulthiame          | Inhibition of carbonic anhydrase and blocking of sodium channels                        | An anticonvulsant for behavioural disorders                                                                          | 0.5179      |
| 69 |   | Tenoxicam          | Prostaglandin G/H synthase 2                                                            | Rheumatoid arthritis, osteoarthritis, backache, and pain.                                                            | 0.4307      |
| 70 |  | Thiabendazole      | Fungal and parasitic fumarate reductase flavoprotein subunit                            | Strongyloidiasis (threadworm), cutaneous larva migrans (creeping eruption), visceral larva migrans, and trichinosis. | 0.5478      |
| 71 |  | Trichlormethiazide | Solute carrier family 12 member 1, Sodium/potassium-transporting ATPase subunit alpha-1 | oedema (including that associated with heart failure) and hypertension.                                              | 0.4989      |
| 72 |  | Pantoprazole       | Potassium-transporting ATPase alpha chain 1                                             | Short-term (up to 16 weeks) treatment of erosive esophagitis.                                                        | 0.5812      |
| 73 |  | Chlorthalidone     | Solute carrier family 12 member 1                                                       | hypertension.                                                                                                        | 0.5073      |

**Table S2: List of biologically tested drug candidates**

| <b>Drug ID</b> | <b>Name of drug candidate</b> | <b>Drug ID</b> | <b>Name of drug candidate</b> |
|----------------|-------------------------------|----------------|-------------------------------|
| 1              | Esomeprazole                  | 13             | Dicumarol                     |
| 2              | Etravirine                    | 14             | Domperidone                   |
| 3              | Fenofibrate                   | 15             | Omeprazole                    |
| 4              | Granisetron                   | 16             | Pantoprazole                  |
| 5              | Lesinurad                     | 17             | Pimobendan                    |
| 6              | Minoxidil                     | 18             | Revaprazan                    |
| 7              | Olanzapine                    | 19             | Sulfadiazine                  |
| 8              | Rilpivirine                   | 20             | Sulfamethazine                |
| 9              | Sulfamethizole                | 21             | Tenoxicam                     |
| 10             | Tranilast                     | 22             | Trichlormethiazide            |
| 11             | Vildagliptin                  | 23             | Chlorthalidone                |
| 12             | Abacavir                      | 24             | Gliclazide                    |

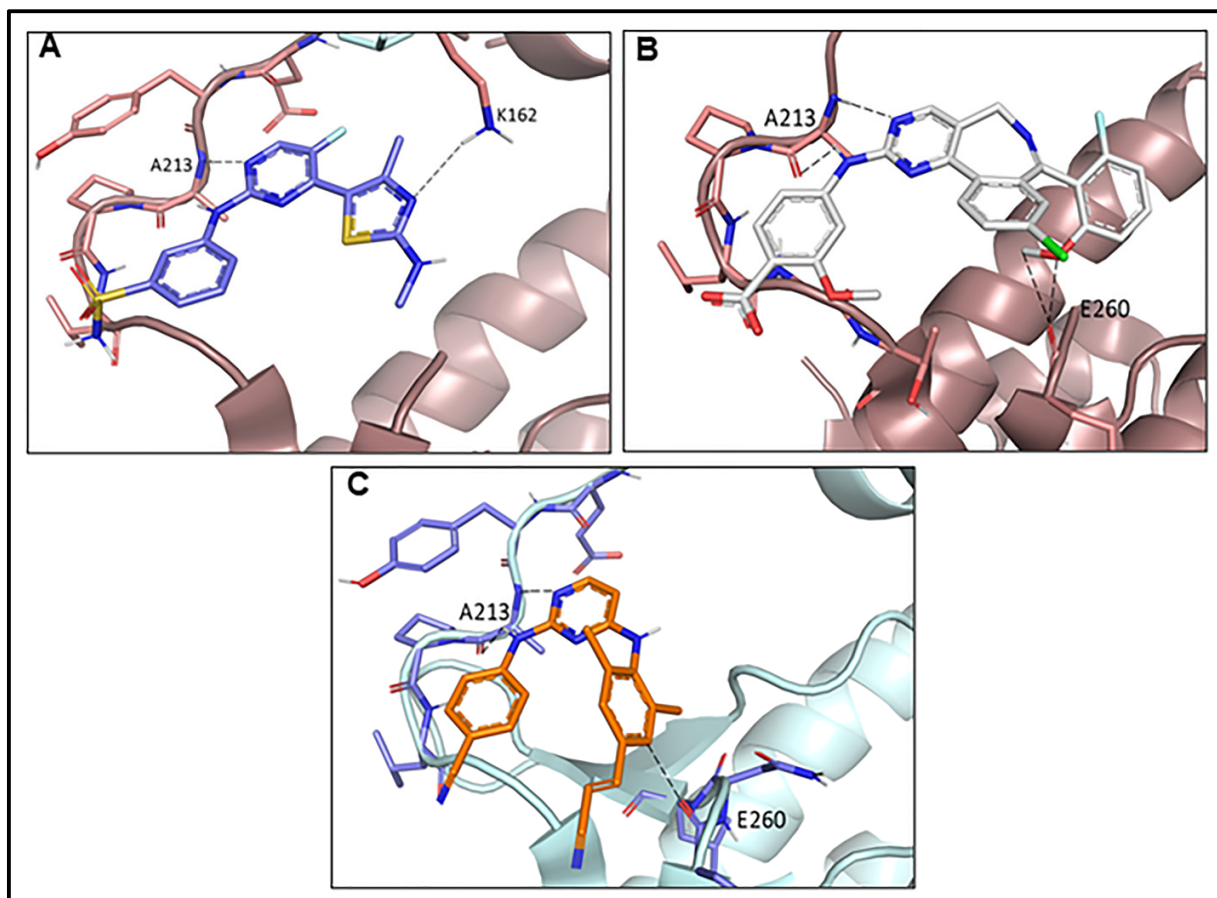

**Figure S1:** Predicted binding modes of CDKi73 docked to Aurora-A (PDB: 2X81) (A), alisertib docked to Aurora-A (PDB: 2X81) (B) and rilpivirine docked to Aurora-A (PDB: 3H0Y)(C). Critical residues are annotated.

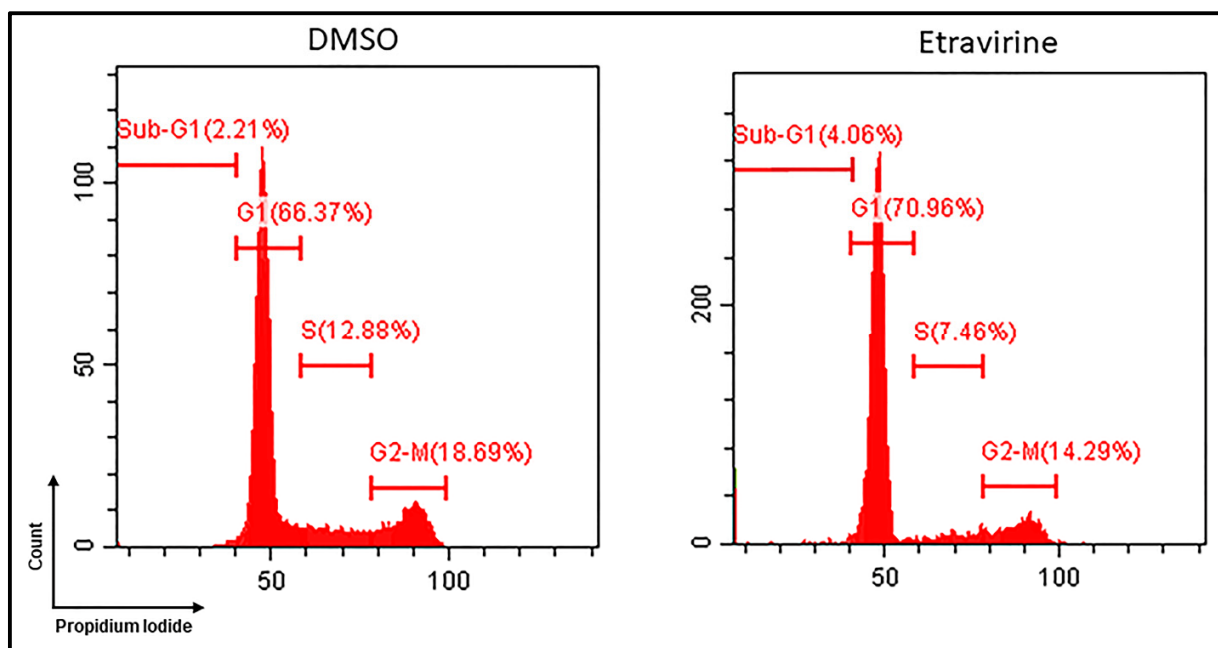

**Figure S2:** Cell cycle analysis of T47D cells after treatment with etravirine (10  $\mu$ M) for 48h. Representative histograms with DNA content are shown.



**A**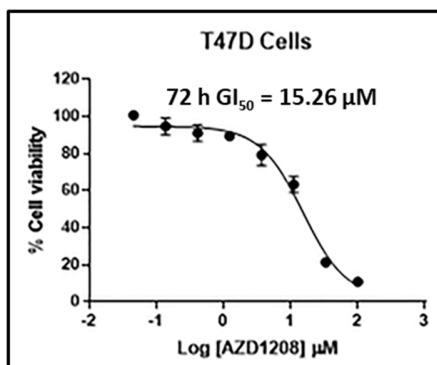**B**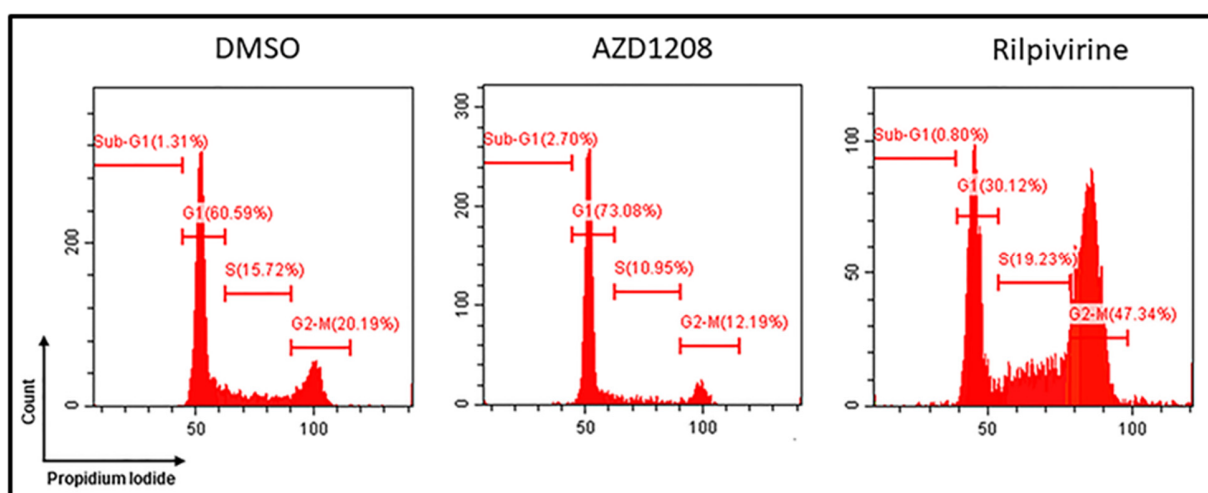

**Figure S3:** (A) Dose-response curve for AZD1208 against T47D cells at 72 hours.  $GI_{50}$  value ( $\mu$ M) is shown. (B) Cell cycle analysis of T47D cells after incubation with AZD1208 (30  $\mu$ M) or rilpivirine (10  $\mu$ M) for 48h. Representative histograms with DNA content are shown.

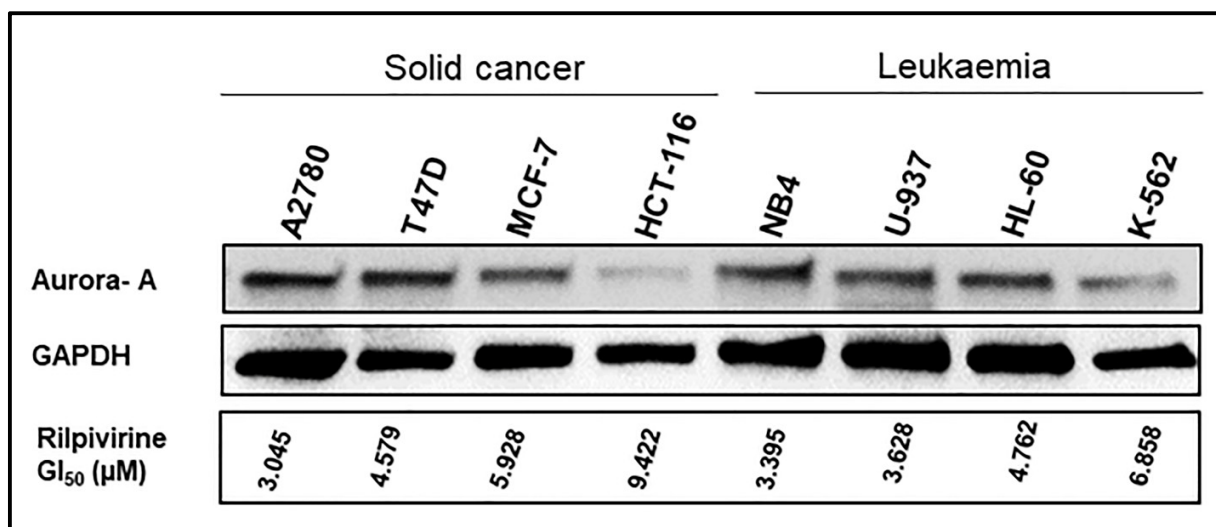

**Figure S4:** Aurora A protein expression across a panel of solid cancer and leukaemia cell lines with varying sensitivity to rilpivirine, as shown by western blot analysis of cell lysates and GI<sub>50</sub> values from 72-hour MTT and resazurin assays, respectively.
